# Supplementary material for: Spillover of active oxygen intermediates of binary RuO 2 /Nb 2 O 5 nanowires for highly active and robust acidic oxygen evolution
Source: Royal Society of Chemistry journal article supplement (doi:10.1039/d4nh00437j), 2025-01-01
Supplement: d4nh00437j1.pdf [file d4nh00437j1.pdf]

## **Spillover of active oxygen intermediates of binary RuO<sub>2</sub>/Nb<sub>2</sub>O<sub>5</sub> nanowires for highly active and robust acidic oxygen evolution**

Linqing Liao,<sup>#ab</sup> Wangyan Gou,<sup>#c</sup> Mingkai Zhang,<sup>d</sup> Xiaohe Tan,<sup>ab</sup> Zening Qi,<sup>e</sup> Min Xie,<sup>e</sup> Yuanyuan Ma<sup>\*ab</sup> and Yongquan Qu<sup>\*ab</sup>

*<sup>a</sup> Research & Development Institute of Northwestern Polytechnical University in*

*Shenzhen, Shenzhen, 518057, China. E-mail: [yyma@nwpu.edu.cn](mailto:yyma@nwpu.edu.cn) ;*

*[yongquan@nwpu.edu.cn](mailto:yongquan@nwpu.edu.cn)*

*<sup>b</sup> Key Laboratory of Special Functional and Smart Polymer Materials of Ministry of*

*Industry and Information Technology, School of Chemistry and Chemical*

*Engineering, Northwestern Polytechnical University, Xi'an, 710072, China.*

*<sup>c</sup> School of Materials Engineering, Xi'an Aeronautical University, Xi'an, 710077,*

*China*

*<sup>d</sup> School of Science Xi'an University of Technology Xi'an, 710048, China*

*<sup>e</sup> Xi'an Yiwei Putai Environmental Protection Co., LTD, Xi'an, 710065, China*

*<sup>#</sup> These authors contributed equally to this study.*

## Experimental details

### Materials

Ruthenium (III) chloride trihydrate ( $\text{RuCl}_3 \cdot 3\text{H}_2\text{O}$ ), N, N-dimethylformamide (DMF) and sulfuric acid ( $\text{H}_2\text{SO}_4$ ) were bought from Energy Chemical. Ruthenium (IV) oxide ( $\text{RuO}_2$ ), Nafion 117 solution (5 wt%), methanol, and polyvinylpyrrolidone (PVP, MW = 1300000) were purchased from Sigma-Aldrich.

### Synthesis of $\text{RuO}_2/\text{Nb}_2\text{O}_5\text{-x}$

In this paper, the stoichiometric ratio of the catalysts was modulated by the molecular ratio of initial metal precursors, labeled as  $\text{RuO}_2/\text{Nb}_2\text{O}_5\text{-x}$  ( $x = n/0.4$ ,  $n$  = mole number of Ru). If not specifically labeled, the sintering temperature was  $400^\circ\text{C}$ .  $\text{RuO}_2/\text{Nb}_2\text{O}_5$  nanotubes were prepared by electrospinning and calcination method. 400 mg of polyvinylpyrrolidone (PVP, MW = 1300000) was dissolved in 1.6 mL of N, N-dimethylformamide (DMF). The solution was placed on a magnetic stirrer and maintained for 12 h.

Niobium chloride ( $\text{NbCl}_5$ ) and ruthenium chloride trihydrate ( $\text{RuCl}_3 \cdot 3\text{H}_2\text{O}$ ) were proportionally weighed with the total amount of 0.4 mmol.  $\text{NbCl}_5$  was dissolved in 500  $\mu\text{L}$  of anhydrous ethanol and  $\text{RuCl}_3 \cdot 3\text{H}_2\text{O}$  was dissolved in 800  $\mu\text{L}$  of DMF, respectively, and each of them was separately sonicated for 15 min. Afterwards, the ruthenium chloride solution was dropped into the PVP solution, followed by the addition of niobium chloride. The mixture was placed under vigorous stirring for 8 h and kept standing for 12 h to remove bubbles.

Next, the precursor solution was added into a plastic syringe and electrospun with an electrostatic spinner at a flow rate of 12 mL/h and a voltage of 13 kV. The precursor was heated up to a predetermined temperature (300°C, 400°C, 500°C) in a tube furnace with a ramping rate of 5 °C/min and maintained for 6 h in air atmosphere, and then cooled naturally to room temperature. The RuO<sub>2</sub>/Nb<sub>2</sub>O<sub>5</sub>-x were prepared. RuO<sub>2</sub> nanowires were synthesized in the same way without the addition of niobium chloride.

### **Material characterization**

X-ray Diffraction (XRD) was performed by a Bruker D8 Advance with an operating voltage of 30 kV and an operating current of 20 mA. Scan rate was 2 °/min. Transmission electron microscopy (TEM) was performed on JEOL JEM-F200 transmission electron microscope at 200 kV, respectively. X-ray photoelectron spectroscopy (XPS) was tested by Thermo Scientific K-Alpha. The test results were corrected with reference to the C 1s peak (284.8 eV). Raman spectra were tested using an INVIAREFLEX Raman spectrometer with an excitation wavelength of 633 nm.

### **Electrochemical measurements**

The catalyst ink containing 4 mg of prepared sample, 768 µL of ultrapure water, 200 µL of anhydrous ethanol and 32 µL of Nafion 117 were prepared through extensive sonication. The prepared slurry was pipetted to form droplets with 3 mm diameter by dropping 10 µL onto carbon paper (1 cm × 3 cm) and dried naturally. The electrochemical test system was a three-electrode system, in which the electrolyte was

0.5 M H<sub>2</sub>SO<sub>4</sub>, the working electrode was carbon paper with loading material, the reference electrode was Hg/Hg<sub>2</sub>Cl<sub>2</sub>/KCl electrode, and the counter electrode was graphite sheet electrode.

According to the equation:

$$E(\text{versus RHE}) = E(\text{versus Hg / HgO}) + 0.241 \text{ V} + 0.059 \text{ V} \times pH$$

All measured potentials in this document were calibrated to the reversible hydrogen electrode (RHE) potential. Linear scanning voltametric curves (LSV) were tested at a scan rate of 10 mV s<sup>-1</sup>. The linear part of the Tafel plot was simulated polarization curve by the Tafel equation ( $\eta = b \log[i] + a$ ) to obtain the Tafel slope. The turnover frequency (TOF) was calculated by  $\text{TOF} = (j \times A) / (4 \times F \times n)$ , where  $j$  was the current density (mA cm<sup>-2</sup>) at a particular overpotential,  $A$  was the area (cm<sup>2</sup>) of the working electrode,  $F$  was the Faraday constant (96,500 C mol<sup>-1</sup>), and  $n$  was the number of moles of the active materials. The mass activity could be calculated by mass activity =  $j/m$ , where  $m$  was the mass loading of Ru in the working electrode (mg cm<sup>-2</sup>) and  $j$  was the measured current density (mA cm<sup>-2</sup>) at given potential. The S-numbers ( $S = n_{\text{O}_2}/n_{\text{Ru}}$ ) of various catalysts at 10 mA cm<sup>-2</sup> were calculated. The CV curves at different scan rates (10 mV s<sup>-1</sup>-60 mV s<sup>-1</sup>) were linearly fitted to obtain  $C_{\text{dl}}$ , and the electrochemically active surface area (ECSA) was obtained by further calculations ( $\text{ECSA} = C_{\text{dl}}/C_s$ ,  $C_s = 0.06 \text{ mF/cm}^2$ ).

***In situ* attenuated total reflectance-surface-enhanced infrared absorption spectra (ATR-SEIRAS).** The ATR-SEIRAS experiments were carried out by a Nicolet

iS50 FT-IR spectrometer equipped with a chemically deposited ultra-thin Au film as working electrode for infrared signal enhancement. The catalyst slurry was dripped onto carbon paper and then connected to the working electrode after drying, while saturated Hg/Hg<sub>2</sub>Cl<sub>2</sub>/KCl electrode and graphite rod served as reference electrode and counter electrode, respectively. *In situ* ATR-SEIRAS signals were recorded when the electrodes were under potentiostatic tests.

***In situ* Raman spectrometry measurements.** *In situ* Raman measurements were carried out jointly by an inVia-Reflex (Renishaw, 633 nm) and a CHI 760 electrochemical workstation. A homemade Teflon cell with a quartz window was used as the reactor for the *in-situ* measurements. The obtained electrodes, Hg/Hg<sub>2</sub>Cl<sub>2</sub>/KCl electrode, and platinum wire served as the working electrode, reference electrode, and counter electrode, respectively. The working electrode was immersed into the electrolyte with different configurations and the electrode plane was maintained perpendicular to the laser. *In situ* Raman spectra were obtained when the electrodes were under potentiostatic control. The experiments were controlled within 300 s under the fixed potential.

**Table. S1.** ICP-ES analysis of RuO<sub>2</sub>/Nb<sub>2</sub>O<sub>5</sub>-0.5, RuO<sub>2</sub>/Nb<sub>2</sub>O<sub>5</sub>-0.6 and RuO<sub>2</sub>/Nb<sub>2</sub>O<sub>5</sub>-0.7.

| <b>Sample</b>                                         | <b>Ru<br/>loading(wt%)</b> | <b>Nb<br/>loading(wt%)</b> | <b>Molar ratio of Ru:(Ru+Nb)</b> |
|-------------------------------------------------------|----------------------------|----------------------------|----------------------------------|
| RuO <sub>2</sub> /Nb <sub>2</sub> O <sub>5</sub> -0.5 | 12.32%                     | 11.15%                     | 0.50                             |
| RuO <sub>2</sub> /Nb <sub>2</sub> O <sub>5</sub> -0.6 | 25.69%                     | 16.20%                     | 0.59                             |
| RuO <sub>2</sub> /Nb <sub>2</sub> O <sub>5</sub> -0.7 | 15.68%                     | 6.45%                      | 0.69                             |

**Table S2.** Quantitative analysis of RuO<sub>2</sub>/Nb<sub>2</sub>O<sub>5</sub>-0.6 by energy-dispersive X-ray spectroscopy.

| <b>Element</b> | <b>(keV)</b> | <b>Mass%</b> | <b>Atom%</b> |
|----------------|--------------|--------------|--------------|
| O K (Ref.)     | 0.525        | 25.48        | 67.70        |
| Nb L           | 2.166        | 26.08        | 11.93        |
| Ru L           | 2.558        | 48.44        | 20.37        |
| Total          | -            | 100.00       | 100.00       |

**Table. S3.** Comparison of activity and stability of OER with previous reports.

| Entry | Catalyst                                               | Overpotential ( $\eta_0$ )<br>at 10 mA cm <sup>-2</sup> [mV] | Stability<br>at 10 mA cm <sup>-2</sup> [h] | Reference        |
|-------|--------------------------------------------------------|--------------------------------------------------------------|--------------------------------------------|------------------|
|       | <b>RuO<sub>2</sub>/Nb<sub>2</sub>O<sub>5</sub>-0.6</b> | <b>179</b>                                                   | <b>750</b>                                 | <b>This work</b> |
| 1     | (Ru, Mn) <sub>2</sub> O <sub>3</sub>                   | 168                                                          | 40                                         | Ref. 1           |
| 2     | IrCuNi                                                 | 273                                                          | -                                          | Ref. 2           |
| 3     | Ir/Nb <sub>2</sub> O <sub>5</sub>                      | 218                                                          | 105                                        | Ref. 3           |
| 4     | IrO <sub>x</sub> /Ti                                   | 254                                                          | 100                                        | Ref. 4           |
| 5     | Ni-RuO <sub>2</sub>                                    | 214                                                          | >200                                       | Ref. 5           |
| 6     | RuO <sub>2</sub> /D-TiO <sub>2</sub>                   | 180                                                          | 100                                        | Ref. 6           |
| 7     | Li <sub>0.52</sub> RuO <sub>2</sub>                    | 156                                                          | 70                                         | Ref. 7           |
| 8     | SF-RuO <sub>2</sub>                                    | 196                                                          | 24                                         | Ref. 8           |
| 9     | Sn <sub>0.1</sub> -RuO <sub>2</sub> @NCP               | 178                                                          | 150                                        | Ref. 9           |
| 10    | RuPbOx                                                 | 196                                                          | 100                                        | Ref. 10          |
| 11    | Ru <sub>1</sub> Ir <sub>1</sub> O <sub>x</sub>         | 204                                                          | 110                                        | Ref. 11          |
| 12    | SrRuIr                                                 | 190                                                          | 1500                                       | Ref. 12          |
| 13    | C-RuO <sub>2</sub> -RuSe-5                             | 212                                                          | 50                                         | Ref. 13          |
| 14    | Ru(anc)-Co <sub>3</sub> O <sub>4</sub>                 | 198.5                                                        | 150                                        | Ref. 14          |
| 15    | La-RuO <sub>2</sub>                                    | 208                                                          | -                                          | Ref. 15          |
| 16    | Ru-UiO-67-bpydc                                        | 200                                                          | 115                                        | Ref. 16          |
| 17    | Nd <sub>0.1</sub> RuO <sub>x</sub>                     | 211                                                          | 50                                         | Ref. 17          |
| 18    | M-RuIrFeCoNiO <sub>2</sub>                             | 189                                                          | 120                                        | Ref. 18          |

**Table S4.** The O<sub>H</sub>/O<sub>V</sub> of catalysts.

| Catalyst                                              | O <sub>H</sub> /O <sub>V</sub> |
|-------------------------------------------------------|--------------------------------|
| RuO <sub>2</sub> /Nb <sub>2</sub> O <sub>5</sub> -0.6 | 1.49                           |
| RuO <sub>2</sub> /Nb <sub>2</sub> O <sub>5</sub> -0.5 | 0.68                           |
| RuO <sub>2</sub> /Nb <sub>2</sub> O <sub>5</sub> -0.7 | 1.08                           |

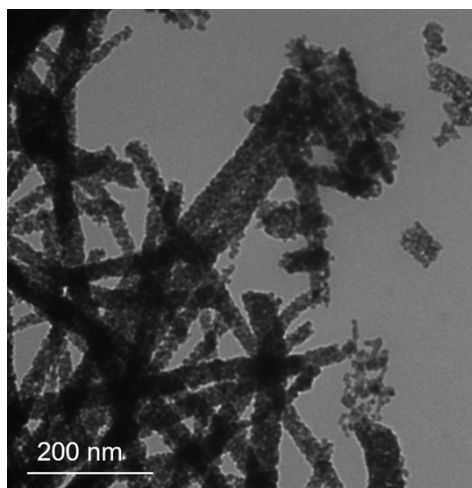

**Fig. S1.** TEM image of as-synthesized RuO<sub>2</sub>.

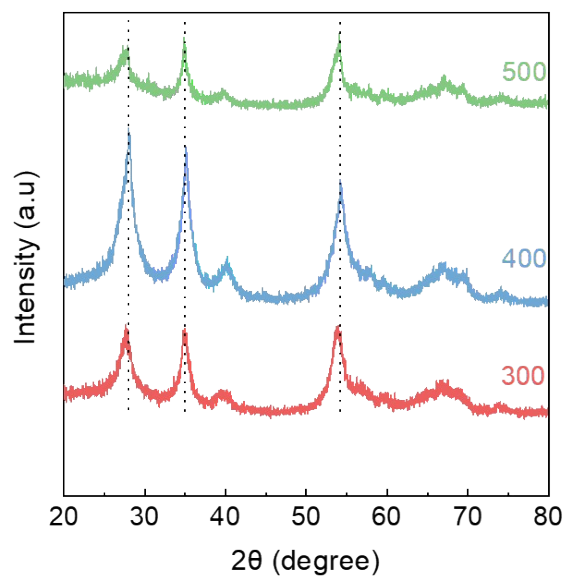

**Fig. S2.** XRD patterns of RuO<sub>2</sub>/Nb<sub>2</sub>O<sub>5</sub>-0.6 prepared at different calcination temperatures (300°C, 400°C and 500°C).

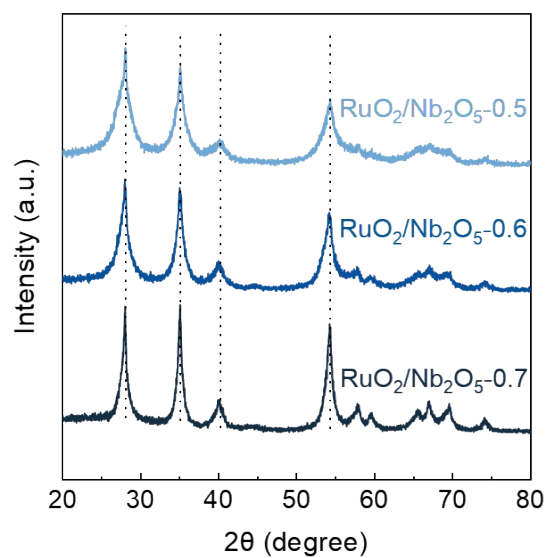

**Fig. S3.** XRD patterns of RuO<sub>2</sub>/Nb<sub>2</sub>O<sub>5</sub>-x (x=0.5, 0.6, 0.7) synthesized at 400 °C.

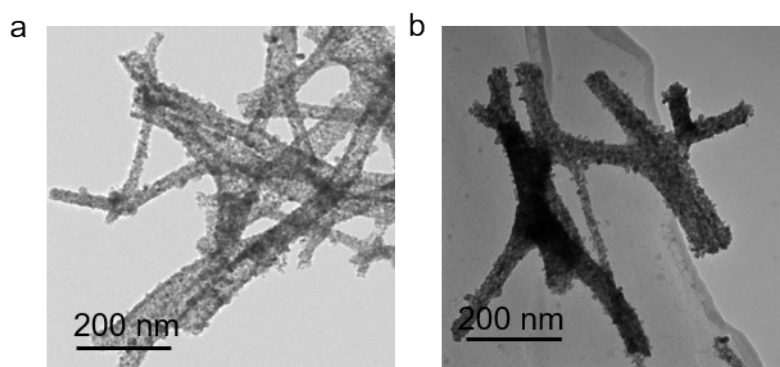

**Fig. S4.** TEM images of (a) RuO<sub>2</sub>/Nb<sub>2</sub>O<sub>5</sub>-0.7, (b) RuO<sub>2</sub>/Nb<sub>2</sub>O<sub>5</sub>-0.5.

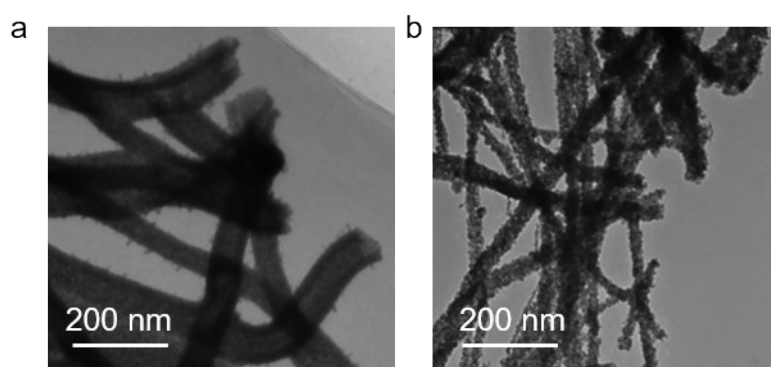

**Fig. S5.** TEM images of RuO<sub>2</sub>/Nb<sub>2</sub>O<sub>5</sub>-0.6 calcinated at (a) 300°C and (b) 500°C.

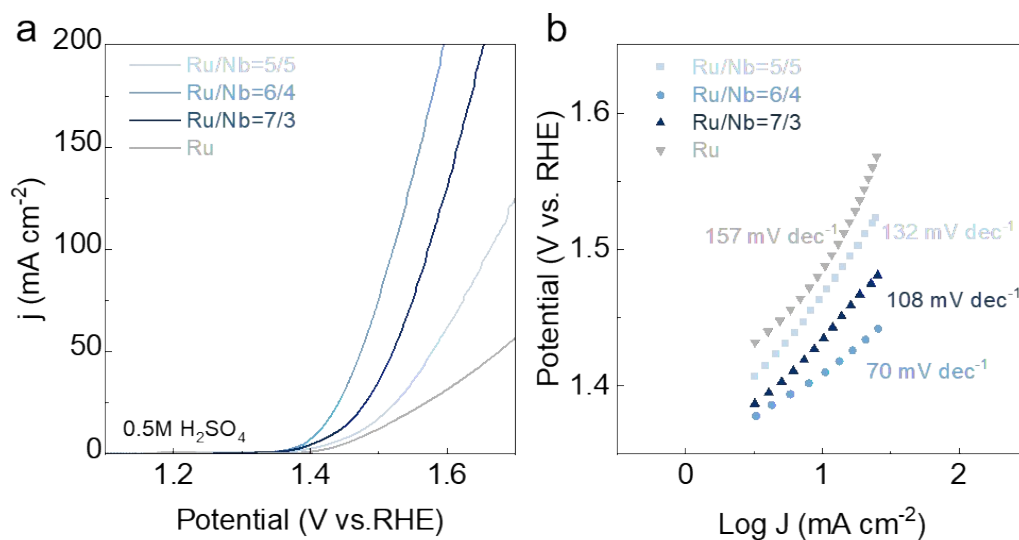

**Fig. S6.** (a) LSV curves and (b) Tafel slopes of RuO<sub>2</sub>/Nb<sub>2</sub>O<sub>5-x</sub> (x=0.5, 0.6 and 0.7) prepared at 400 °C in 0.5 M H<sub>2</sub>SO<sub>4</sub> solution.

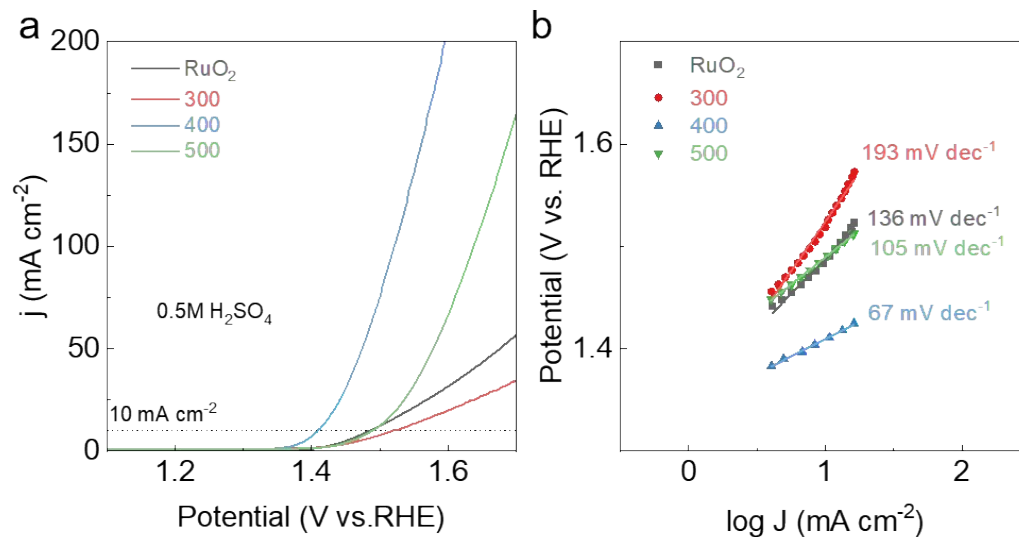

**Fig. S7.** (a) LSV curves and (b) Tafel slopes of RuO<sub>2</sub>/Nb<sub>2</sub>O<sub>5-0.6</sub> calcinated at 300°C, 400°C and 500°C in 0.5 M H<sub>2</sub>SO<sub>4</sub> solution.

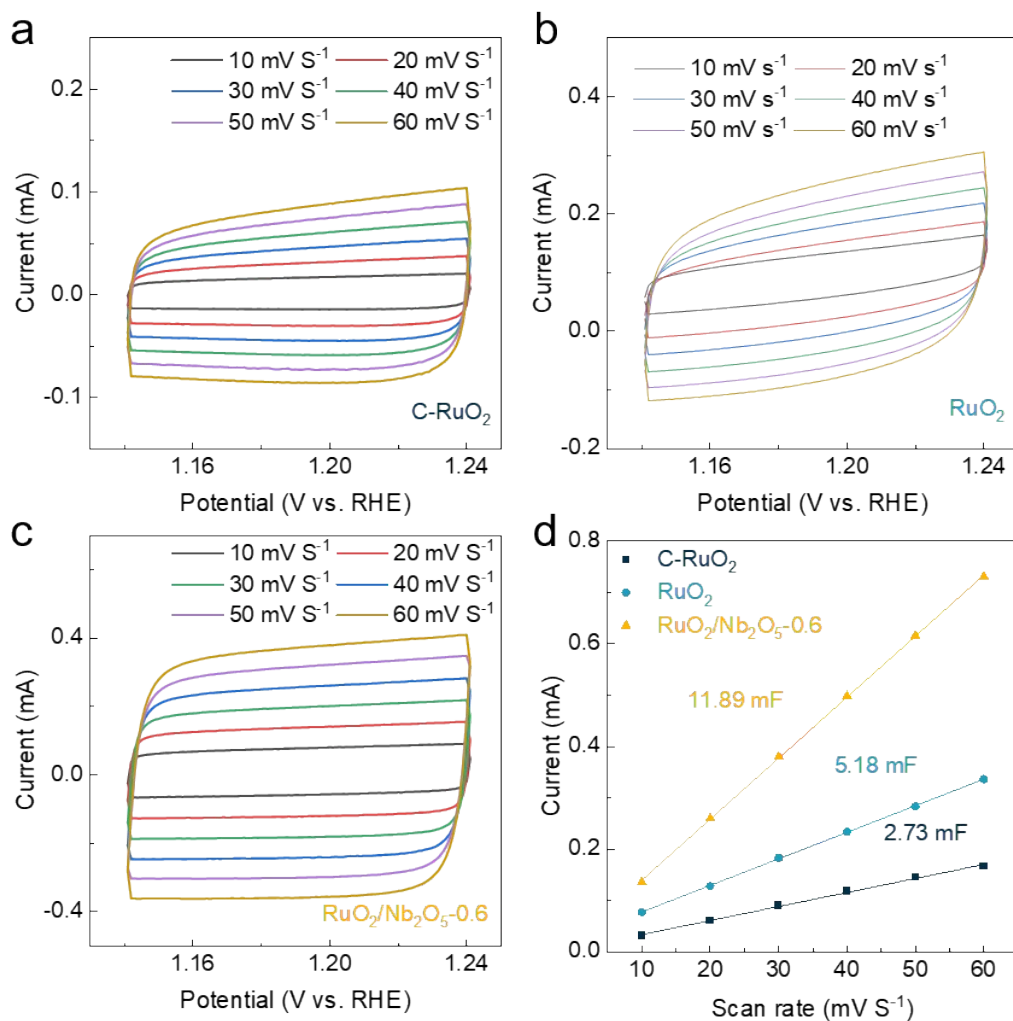

**Fig. S8.** CV curves of (a) C-RuO<sub>2</sub>, (b) RuO<sub>2</sub>, (c) RuO<sub>2</sub>/Nb<sub>2</sub>O<sub>5</sub>-0.6 at different scan rates. (d) Charging currents differences plotted versus scan rates.

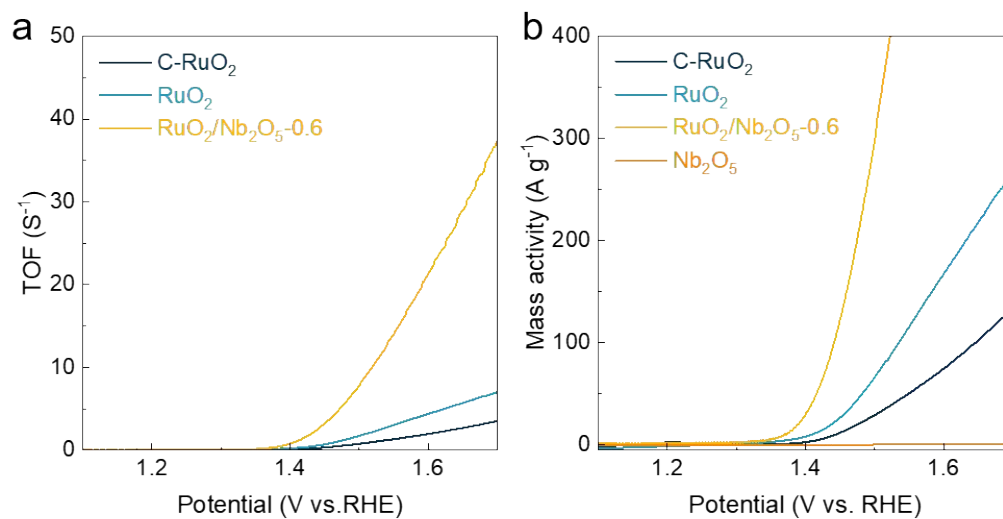

**Fig. S9.** (a) TOFs and (b) mass activities of various electrocatalysts.

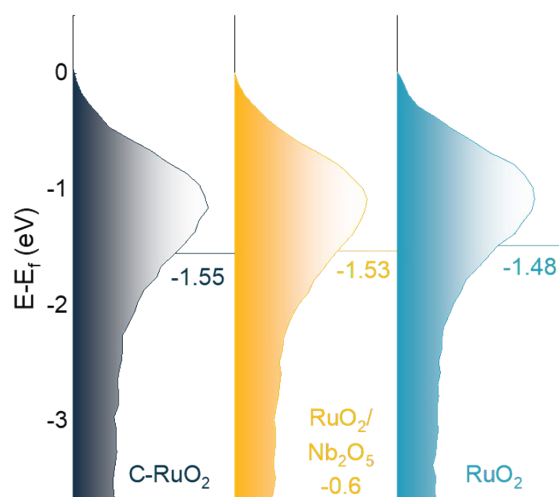

**Fig. S10.** The d-band of  $\text{RuO}_2/\text{Nb}_2\text{O}_5\text{-}0.6$ ,  $\text{RuO}_2$ ,  $\text{C-RuO}_2$  catalysts determined by high-resolution valence-band (VB) XPS spectra.

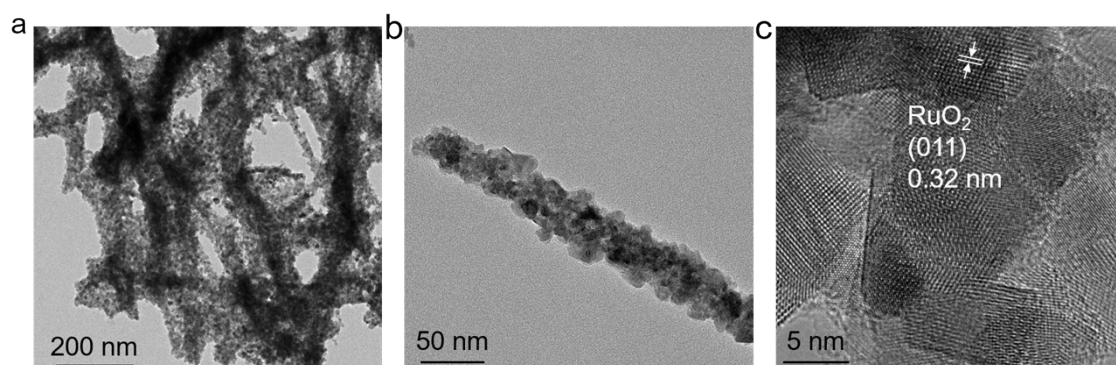

**Fig. S11.** (a) Low magnification and (b) high magnification TEM images of  $\text{RuO}_2/\text{Nb}_2\text{O}_5\text{-}0.6$ . (c) HRTEM image of  $\text{RuO}_2/\text{Nb}_2\text{O}_5\text{-}0.6$  after stability test.

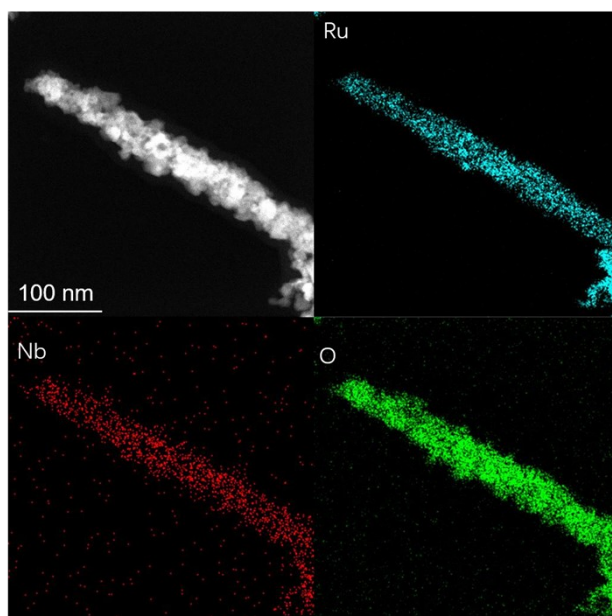

**Fig. S12.** Elemental mapping images of Ru (blue), Nb (red), and O (green) in  $\text{RuO}_2/\text{Nb}_2\text{O}_5\text{-}0.6$  after stability test.

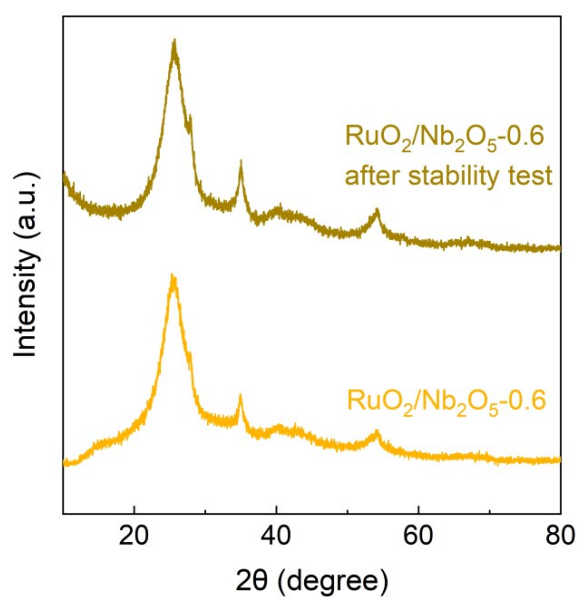

**Fig. S13.** XRD patterns of as-synthesized and spent  $\text{RuO}_2/\text{Nb}_2\text{O}_5\text{-}0.6$  catalysts.

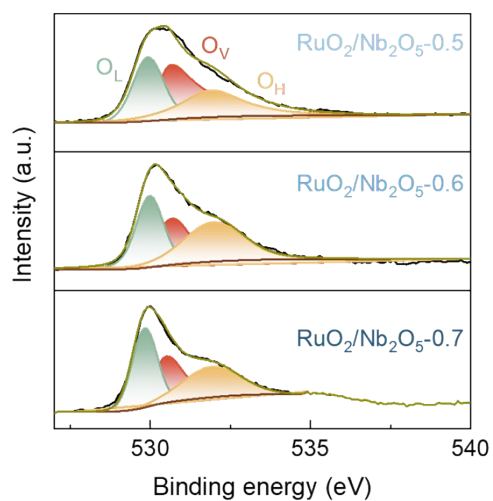

**Fig. S14.** The O 1s XPS spectra of  $\text{RuO}_2/\text{Nb}_2\text{O}_5-0.5$ ,  $\text{RuO}_2/\text{Nb}_2\text{O}_5-0.6$  and  $\text{RuO}_2/\text{Nb}_2\text{O}_5-0.7$ .

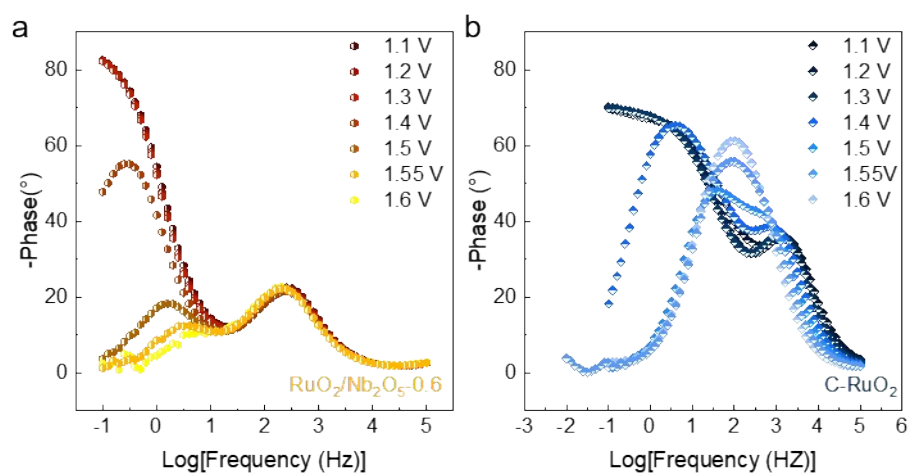

**Fig. S15.** Bode phase plots of (a)  $\text{RuO}_2/\text{Nb}_2\text{O}_5-0.6$ , (b)  $\text{C-RuO}_2$ .

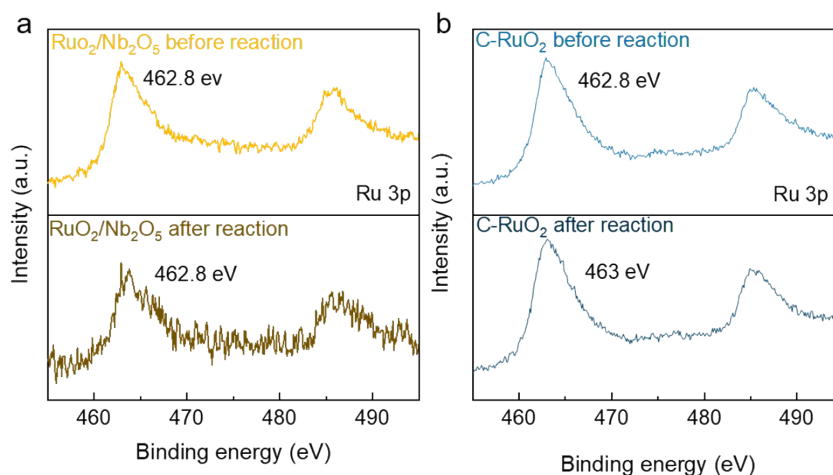

**Fig. S16.** Ru 3p XPS spectra of (a) RuO<sub>2</sub>/Nb<sub>2</sub>O<sub>5</sub>-0.6 and (b) C-RuO<sub>2</sub> before and after stability test for 10h.

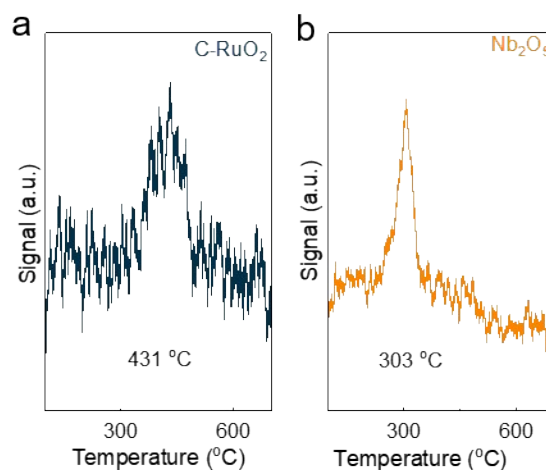

**Fig. S17.** O<sub>2</sub>-TPD profiles of (a) C-RuO<sub>2</sub> and (b) RuO<sub>2</sub>/Nb<sub>2</sub>O<sub>5</sub>-0.6.

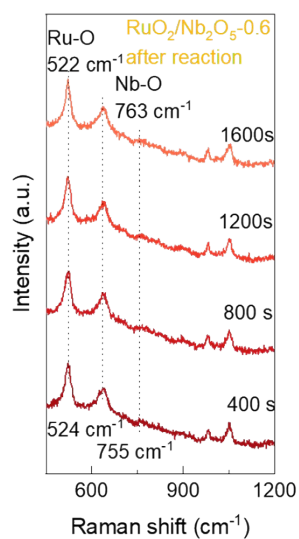

**Fig. S18.** The operando Raman spectra of RuO<sub>2</sub>/Nb<sub>2</sub>O<sub>5</sub>-0.6 recorded at 400 s, 800 s, 1200 s and 1600 s after reaction with the circuit disconnected.

## References

1. Y. Qin, B. Cao, X.-Y. Zhou, Z. Xiao, H. Zhou, Z. Zhao, Y. Weng, J. Lv, Y. Liu, Y.-B. He, F. Kang, K. Li and T.-Y. Zhang, *Nano Energy*, 2023, **115**, 108727.
2. D. Liu, Q. Lv, S. Lu, J. Fang, Y. Zhang, X. Wang, Y. Xue, W. Zhu and Z. Zhuang, *Nano Lett.*, 2021, **21**, 2809-2816.
3. Z. Shi, J. Li, J. Jiang, Y. Wang, X. Wang, Y. Li, L. Yang, Y. Chu, J. Bai, J. Yang, J. Ni, Y. Wang, L. Zhang, Z. Jiang, C. Liu, J. Ge and W. Xing, *Angew. Chem. Int. Ed.*, 2022, **61**, e202212341.
4. Y. Wang, R. Ma, Z. Shi, H. Wu, S. Hou, Y. Wang, C. Liu, J. Ge and W. Xing, *Chem*, 2023, **9**, 2931-2942.
5. Z.-Y. Wu, F.-Y. Chen, B. Li, S.-W. Yu, Y. Z. Finfrock, D. M. Meira, Q.-Q. Yan, P. Zhu, M.-X. Chen, T.-W. Song, Z. Yin, H.-W. Liang, S. Zhang, G. Wang and H. Wang, *Nat. Mater.*, 2023, **22**, 100-108.
6. X. Wang, X. Wan, X. Qin, C. Chen, X. Qian, Y. Guo, Q. Xu, W.-B. Cai, H. Yang and K. Jiang, *ACS Catal.*, 2022, **12**, 9437-9445.
7. Y. Qin, T. Yu, S. Deng, X.-Y. Zhou, D. Lin, Q. Zhang, Z. Jin, D. Zhang, Y.-B. He, H.-J. Qiu, L. He, F. Kang, K. Li and T.-Y. Zhang, *Nat. Commun.*, 2022, **13**, 3784.
8. R. Jiang, Y. Da, J. Zhang, H. Wu, B. Fan, J. Li, J. Wang, Y. Deng, X. Han and W. Hu, *Appl. Catal. B*, 2022, **316**, 121682.
9. L. Qiu, G. Zheng, Y. He, L. Lei and X. Zhang, *Chem. Eng. J.*, 2021, **409**, 128155.
10. R. Huang, Y. Wen, H. Peng and B. Zhang, *Chinese J. Catal.*, 2022, **43**, 130-138.
11. J. He, X. Zhou, P. Xu and J. Sun, *Adv. Energy Mater.*, 2021, **11**, 2102883.
12. Y. Wen, P. Chen, L. Wang, S. Li, Z. Wang, J. Abed, X. Mao, Y. Min, C. T. Dinh, P. Luna, R. Huang, L. Zhang, L. Wang, L. Wang, R. J. Nielsen, H. Li, T. Zhuang, C. Ke, O. Voznyy, Y. Hu, Y. Li, W. A. Goddard, III, B. Zhang, H. Peng and E. H. Sargent, *J. Am. Chem. Soc.*, 2021, **143**, 6482-6490.
13. J. Wang, C. Cheng, Q. Yuan, H. Yang, F. Meng, Q. Zhang, L. Gu, J. Cao, L. Li, S.-C. Haw, Q. Shao, L. Zhang, T. Cheng, F. Jiao and X. Huang, *Chem*, 2022, **8**, 1673-1687.
14. Y. Hao, S.-F. Hung, W.-J. Zeng, Y. Wang, C. Zhang, C.-H. Kuo, L. Wang, S. Zhao, Y. Zhang, H.-Y. Chen and S. Peng, *J. Am. Chem. Soc.*, 2023, **145**, 23659-23669.
15. Y. Wu, R. Yao, Q. Zhao, J. Li and G. Liu, *Chem. Eng. J.*, 2022, **439**, 135699.
16. N. Yao, H. Jia, J. Zhu, Z. Shi, H. Cong, J. Ge and W. Luo, *Chem*, 2023, **9**, 1882-1896.
17. L. Li, G. Zhang, J. Xu, H. He, B. Wang, Z. Yang and S. Yang, *Adv. Funct. Mater.*, 2023, **33**, 2213304.
18. C. Hu, K. Yue, J. Han, X. Liu, L. Liu, Q. Liu, Q. Kong, C.-W. Pao, Z. Hu, K. Suenaga, D. Su, Q. Zhang, X. Wang, Y. Tan and X. Huang, *Sci. Adv.*, 2023, **9**, eadf9144.
